# Supplementary material
Source: PubMed Central journal article supplement (PMC3517270)
Supplement: supp_12-10781_IOVS-12-10781-s01.pdf [file supp_12-10781_IOVS-12-10781-s01.pdf]

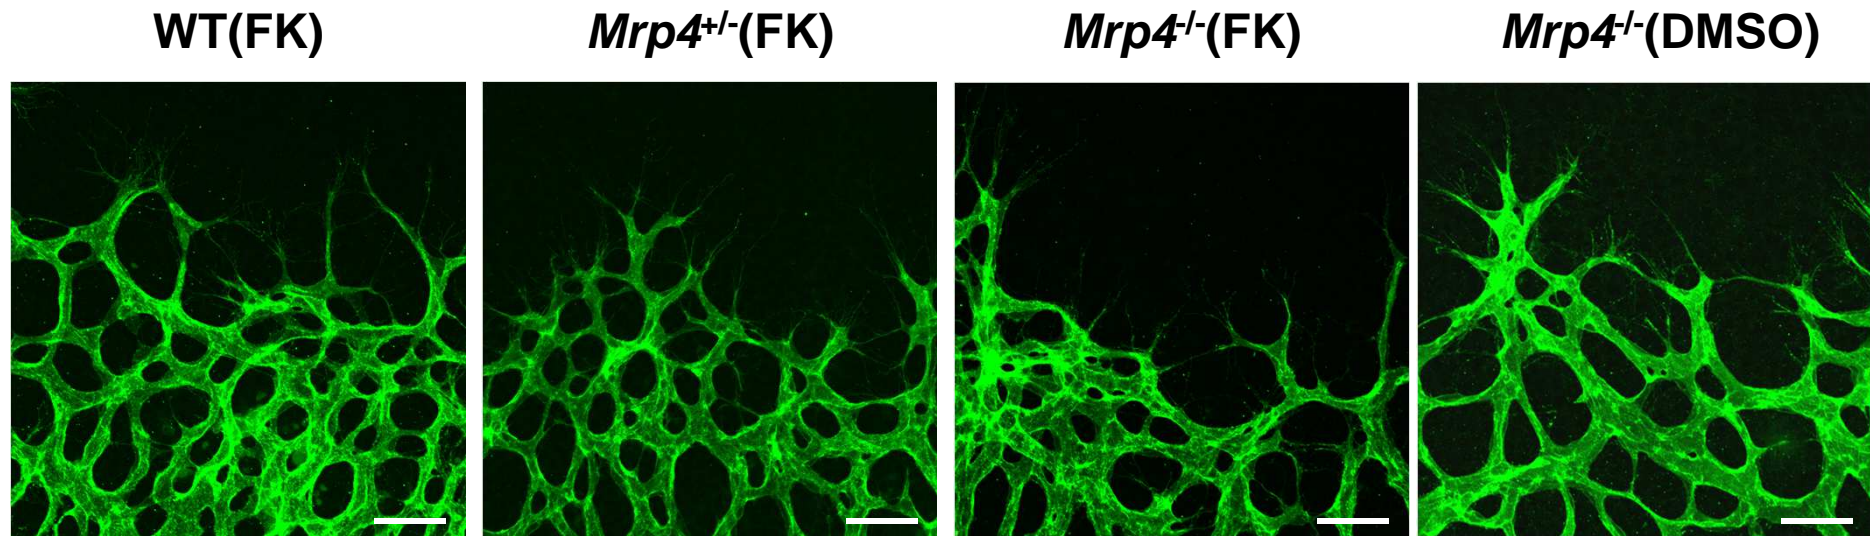

**Supplementary Figure S1. Retinal vascular phenotype at vascular front.**

Whole-mount immunostaining for PECAM in P6 retinas. FK = forskolin. DMSO = dimethyl sulfoxide. Scale bar = 50  $\mu$ m.
