# Supplementary material
Source: PubMed Central journal article supplement (PMC3517270)
Supplement: supp_12-10781_IOVS-12-10781-s02.pdf [file supp_12-10781_IOVS-12-10781-s02.pdf]

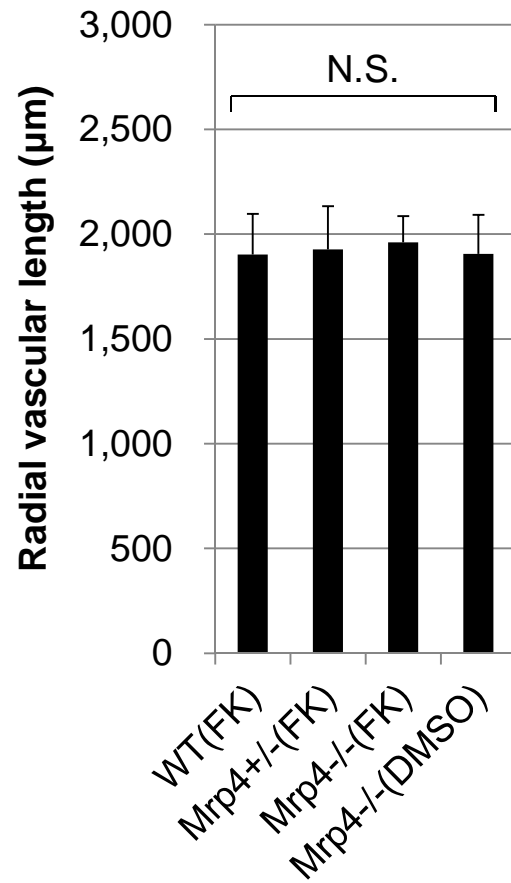

**Supplementary Figure S2. Radial vascular extension.**

Quantification of radial vascular length (the distance between center of the optic disc and the vascular front) in forskolin- or DMSO-treated P6 retinas. The data are provided as the mean  $\pm$  standard deviation. N.S. = not significant.
