# Supplementary material
Source: PubMed Central journal article supplement (PMC3517270)
Supplement: supp_12-10781_IOVS-12-10781-s03.pdf [file supp_12-10781_IOVS-12-10781-s03.pdf]

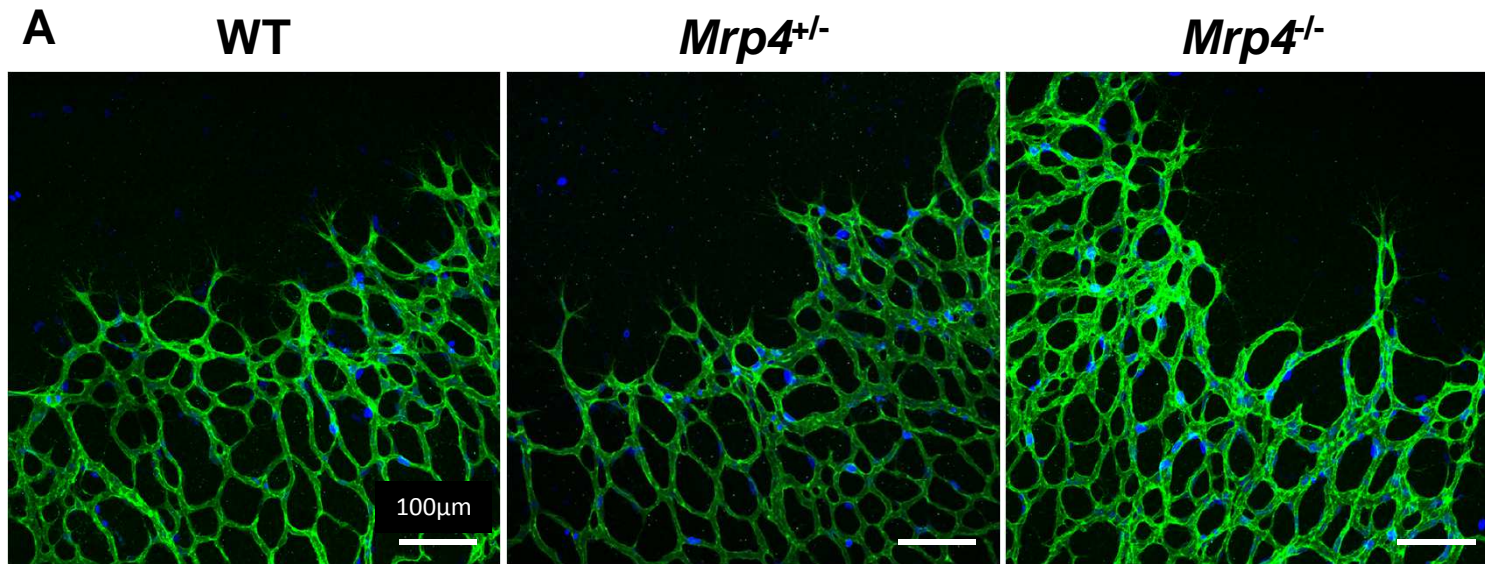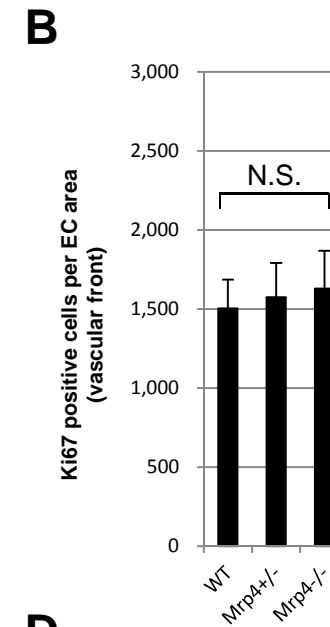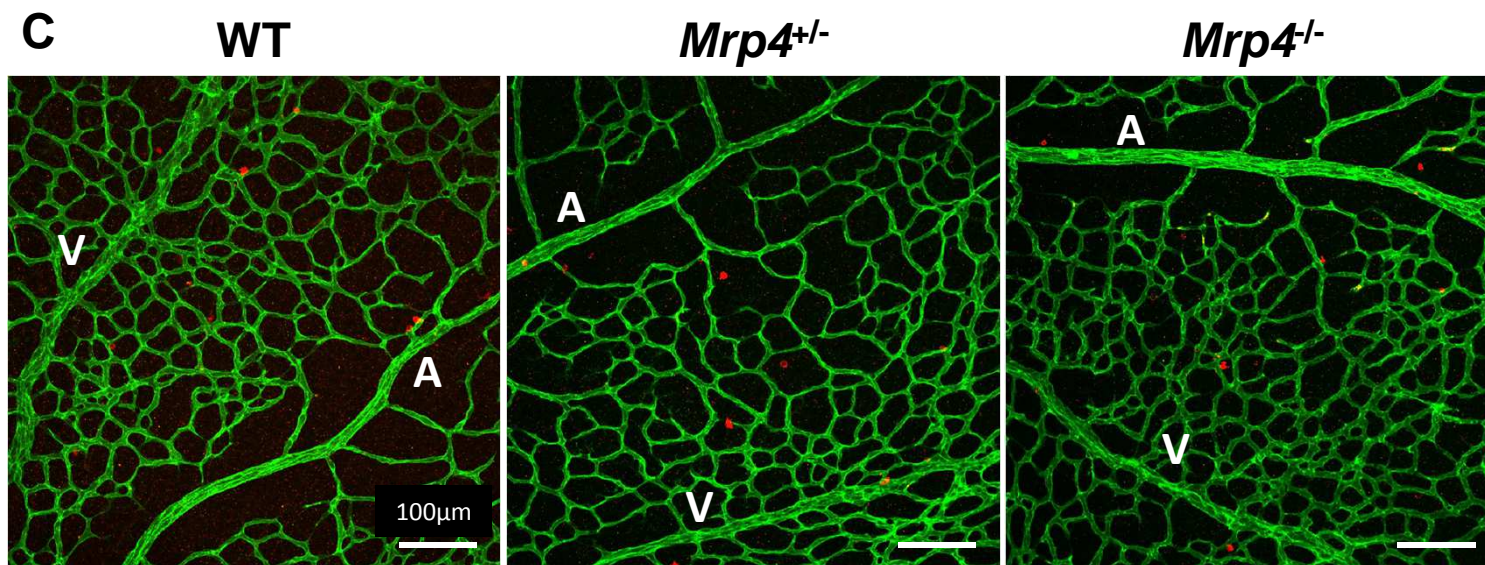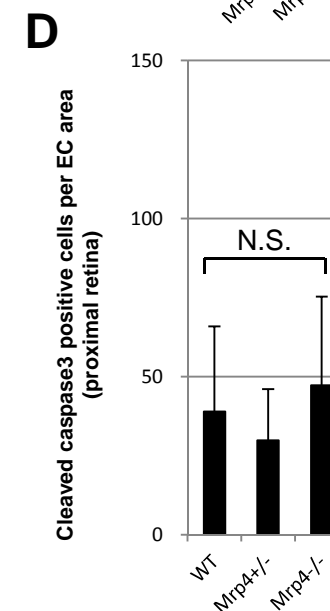

**Supplementary Figure S3.  
EC proliferation and apoptosis  
in non-treated mice.**

(A) Images of P6 retinas (at the vascular front) labeled for PECAM (green) and Ki67 (blue).

(B) Quantification of the number of Ki67-positive cells per EC area.

(C) Images of P6 retinas (in the proximal retina) labeled for PECAM (green) and cleaved caspase 3 (red).

(D) Quantification of the number of cleaved caspase 3-positive cells per EC area. The data are provided as the mean  $\pm$  standard deviation. A = artery. V = vein. N.S. = not significant.
